## **JNK signaling regulates oviposition in the malaria vector *Anopheles gambiae***

Matthew J. Peirce<sup>a\*</sup>, Sara N. Mitchell<sup>b, c</sup>, Evdoxia G. Kakani<sup>b, c</sup>, Paolo Scarpelli<sup>a</sup>, Adam South<sup>b</sup>, W. Robert Shaw<sup>b</sup>, Kristine L. Werling<sup>b</sup>, Paolo Gabrieli<sup>a, d</sup>, Perrine Marcenac<sup>b</sup>, Martina Bordoni<sup>a</sup>, Vincenzo Talesa<sup>a</sup> and Flaminia Catteruccia<sup>b #\*</sup>

- a. Dipartimento di Medicina Sperimentale, Università degli Studi di Perugia, Perugia 06132, Italy.
- b. Department of Immunology and Infectious Diseases, Harvard T.H. Chan School of Public Health, Boston, MA 02115, USA.
- c. Current Address: Verily Life Sciences, South San Francisco, CA 94080, USA.
- d. Current Address: Dipartimento Bioscienze, University of Milan, Milan 20133, Italy

# Lead contact

\* Correspondence:

Matthew J Peirce (ORCID 0000-0003-3648-5639)  
Piano 4, Edificio D,  
Piazzale Gambuli 1,  
Sant' Andrea delle Fratte  
06132 Perugia  
Italy

Tel. 0039 075 585 8007  
Email: [matthew.peirce@unipg.it](mailto:matthew.peirce@unipg.it)

Flaminia Catteruccia  
665 Huntington Avenue, Building 1  
Room 103  
Boston, MA 02115  
USA

Tel. 001 [617.432.1773](tel:617.432.1773)  
Email: [fcatter@hsph.harvard.edu](mailto:fcatter@hsph.harvard.edu)

1 **ABSTRACT**

2 The reproductive fitness of the *Anopheles gambiae* mosquito represents a promising target to  
3 prevent malaria transmission. The ecdysteroid hormone 20-hydroxyecdysone (20E), transferred  
4 from male to female during copulation, is key to *An. gambiae* reproductive success as it licenses  
5 females to oviposit eggs developed after blood feeding. Here we show that 20E-triggered oviposition  
6 in these mosquitoes is regulated by the stress- and immune-responsive c-Jun N-terminal kinase  
7 (JNK). The heads of mated females exhibit a transcriptional signature reminiscent of a JNK-  
8 dependent wounding response while mating — or injection of virgins with exogenous 20E —  
9 selectively activates JNK in the same tissue. RNAi-mediated depletion of JNK pathway components  
10 inhibits oviposition in mated females, whereas JNK activation by silencing the JNK phosphatase  
11 *puckered* induces egg laying in virgins. Together, these data identify JNK as a potential conduit  
12 linking stress responses and reproductive success in the most important vector of malaria.

## 13 INTRODUCTION

14 *Anopheles gambiae* mosquitoes are the most important vectors for *Plasmodium* malaria parasites,  
15 which infected at least 200 million people and caused more than 400,000 deaths in 2018 (WHO,  
16 2019). The number of malaria deaths has more than halved since the year 2000 largely as a result  
17 of mosquito control strategies, especially insecticide-treated bed nets (WHO, 2019). This promising  
18 progress is, however, threatened by the spread of insecticide resistance in *Anopheles* populations  
19 (Hemingway, 2014), highlighting the pressing need for novel strategies for mosquito control. A  
20 number of recently proposed alternatives aim at reducing vector populations by regulating female  
21 reproductive output via either chemical (Childs et al., 2016) or genetic (Hammond et al., 2016)  
22 means, and their successful development is dependent upon a detailed understanding of the  
23 mechanisms regulating reproduction in *Anopheles* (Mitchell and Catteruccia, 2017).

24 Mating represents a vulnerable step in the *An. gambiae* reproductive cycle as it happens only  
25 once in the female's lifetime. During this single sexual event, males transfer sperm along with a  
26 gelatinous mating plug that contains a host of proteins and other factors produced by the male  
27 accessory glands (Baldini et al., 2012; Rogers et al., 2009), including the ecdysteroid hormone 20-  
28 hydroxyecdysone (20E) (Baldini et al., 2013; Pondeville et al., 2008). Sexual transfer of this steroid  
29 hormone is a feature that is unique to anophelines, having evolved specifically in the *Cellia* subgenus  
30 and exclusively in the lineages leading to the most important African and South East Asian malaria  
31 vectors (Mitchell et al., 2015; Pondeville et al., 2019). Transfer of 20E drives profound behavioral  
32 and physiological changes in the female collectively termed post-mating responses (Baldini et al.,  
33 2013; Gabrieli et al., 2014; Shaw et al., 2014). Perhaps the most striking of these changes are  
34 refractoriness to further mating, underpinning the female's monandry, and a license to oviposit eggs  
35 developed following a blood meal (Gabrieli et al., 2014). Depletion of endogenous 20E levels in  
36 males reduces egg laying rates and increases remating frequency in the females with whom they  
37 mate (Gabrieli et al., 2014). These effects are recapitulated by injection of exogenous 20E in virgin  
38 females, which is sufficient to induce both oviposition of developed eggs and refractoriness to further  
39 copulation (Gabrieli et al., 2014). Importantly, both refractoriness to further mating and the license

40 to oviposit are irreversible, lifelong behavioral switches. However, the molecular processes through  
41 which 20E induces these changes in *An. gambiae* remain unknown.

42 Some insight into the mechanisms regulating these processes may come from the distantly  
43 related dipteran model organism, *Drosophila melanogaster*, where — similar to *An. gambiae* — the  
44 effects of mating include both a temporary refractoriness to further copulation and increased  
45 oviposition. Interestingly, while 20E in *D. melanogaster* does have an important role in regulating  
46 courtship behavior and specifically in the consolidation of long-term courtship memory in males  
47 (Ishimoto and Kitamoto, 2011; Ishimoto et al., 2009), post-mating responses in fruit fly females are  
48 not driven by 20E but by small male accessory gland peptides (Acps) transferred to the female during  
49 mating. These include ovulin, which is implicated in the control of oviposition (Rubinstein and  
50 Wolfner, 2013), and most importantly Acp70A, also known as Sex Peptide (SP) (Chen et al., 1988).  
51 SP is necessary and sufficient to induce the post-mating switch: injection of exogenous SP induces  
52 both refractoriness to mating and oviposition (Chen et al., 1988) while loss of the G protein-coupled  
53 Sex Peptide Receptor (SPR) in females largely blocks these responses (Yapici et al., 2008).  
54 Consistent with its role in modulating female post-mating behavior, SPR is found in neurons  
55 innervating the reproductive tract as well as the brain and ventral nerve chord (Wang et al., 2020;  
56 Yapici et al., 2008), while ovulin acts through octopamine-dependent neurons (Rubinstein and  
57 Wolfner, 2013). The importance of the brain in controlling female responses after copulation in  
58 *Drosophila* is also demonstrated by the fact that in genetic SPR mutants post-mating responses can  
59 be rescued by introducing a mutation that yields a leaky blood-brain barrier phenotype (Hausmann  
60 et al., 2013), identifying the entry of mating factors into the brain as a potentially crucial step in  
61 inducing post-mating changes. Consistent with these findings, the *Drosophila* brain exhibits a robust  
62 transcriptional program following mating or injection of exogenous SP (Dalton et al., 2010).

63 Here we show that 20E-induced oviposition behavior in *An. gambiae* is partially regulated by  
64 c-Jun N-terminal kinase (JNK) signaling in the female head. We detect a strong, mating-induced  
65 transcriptional signature in female heads, enriched in immune genes and reminiscent of a JNK-  
66 dependent wound-healing response. Silencing multiple components of JNK signaling reduces  
67 oviposition rates of mated females, as well as those of virgin females injected with 20E. Conversely,

68 JNK activation by depletion of the negative regulator *puckered* increases oviposition rates in virgin  
69 females. Our results unveil an unexpected link between an important mosquito reproductive behavior  
70 and the activation of JNK, a pathway classically associated with stress resistance and longevity  
71 (Wang et al., 2003, 2005) but which is also pivotal to anti-plasmodium immunity (Garver et al., 2013;  
72 Ramphul et al., 2015).

73

## 74 **RESULTS**

75 *A transcriptional signature of wounding response is found in the head after mating*

76 To gain insight into the molecular basis of the mating response in *An. gambiae*, we performed  
77 transcriptional analysis of the heads of mated and age-matched virgin females at 3 and 24 hours  
78 post mating (hpm). Microarray analysis identified a specific immune signature triggered by mating in  
79 the head, the like of which had not been detected in similar analyses of other *An. gambiae* female  
80 tissues (Gabrieli et al., 2014; Rogers et al., 2008; Shaw et al., 2014). As summarized in Table 1, 23  
81 genes were differentially regulated after mating at the two time points under analysis, 22 of which  
82 were upregulated at either 3 hpm (11 genes) or 24 hpm (11 genes). A single gene, an acyltransferase  
83 (AGAP007078), was down regulated in the head 24 hpm. Functionally, 6 of the 22 upregulated genes  
84 were common to a group of genes previously linked to the wounding response in *An. gambiae*  
85 (Nsango et al., 2013), while 16 were implicated in the melanization pathway, which has been studied  
86 in this species predominantly in the context of *Plasmodium* infection (Barillas-Mury, 2007; Michel  
87 and Kafatos, 2005) but is also strongly linked to wound healing in other insects including *Drosophila*  
88 (Bidla et al., 2009; Lee and Miura, 2014). In addition, 13 of the upregulated genes were previously  
89 found to be preferentially expressed in hemocytes (Pinto et al., 2009), cells related to mammalian  
90 macrophages and central to the repair and regeneration of damaged cells (Fogarty et al., 2016) and  
91 to the wounding-induced transcriptional response in *Drosophila* (Stramer et al., 2008).

92 At the earlier 3 hpm time point we found mating-induced upregulation of transglutaminase 2  
93 (TGase2), a member of an enzyme family involved in chemical crosslinking of proteins in the  
94 hemocel that is implicated in the coagulation responses that follow infection or trauma (Bidla et al.,  
95 2009) and was previously shown to be involved in JNK-dependent wounding responses in *An.*

96 *gambiae* (Nsango et al., 2013) (Table 1). Also upregulated at 3 hpm were two members of the CLIP  
97 protease family, CLIPs B1 and 11E-like, serine proteases which initiate proteolytic cascades leading  
98 to the activation of prophenol oxidases (PPOs) that mediate both melanization (Christensen et al.,  
99 2005) and coagulation (Bidla et al., 2009). We also identified the CLIP inhibitor, Serpin 17, a member  
100 of the serine protease inhibitor (Serpin) family which block CLIP-mediated proteolytic processing of  
101 PPO enzymes (Tang, 2009). Finally, we detected the up-regulation of L-dopachrome tautomerase  
102 (also known as Yellow F2), an enzyme involved in melanin biosynthesis (Christensen et al., 2005)  
103 (Table 1).

104         Among the genes upregulated at 24 hpm we identified three PPOs (PPO2, PPO5, and PPO6)  
105 and three additional CLIP proteases; CLIP15B, CLIPC7, and *gastrulation defective*. Beyond the  
106 melanization pathway we also found multiple thioester-containing proteins (TEP1, TEP4, TEP8 and  
107 TEP19) which are linked to the mosquito complement-like response (Blandin et al., 2008), along with  
108 APL1C (*Anopheles-Plasmodium*-responsive leucine-rich repeat protein 1, isoform C), a member of  
109 the leucine-rich repeat (LRR) immune protein (LRIM) family. APL1C associates with another LRIM  
110 family member (LRIM1, not identified here), and TEP1 in a complex that retains TEP1 in a stably  
111 active form that can then form thioester bonds with surface-exposed proteins of invading pathogens  
112 including *Plasmodium* parasites (Blandin et al., 2004; Fraiture et al., 2009; Povelones et al., 2011),  
113 targeting them for lysis. Taken together, these data suggest mating induces a wounding response  
114 specific to the head of *An. gambiae* females.

115

#### 116 *JNK is activated in the head after mating*

117 The preponderance of wounding-related transcripts in the head after mating prompted us to ask  
118 what signaling pathways might lead to such a response. The importance of the JNK signaling  
119 pathway in the insect wounding response has been highlighted in both *An. gambiae* (Nsango et al.,  
120 2013) and *Drosophila* (Ramet et al., 2002). Since JNK is well known to be activated post-  
121 transcriptionally by phosphorylation, we asked whether mating might increase levels of active  
122 (phosphorylated) JNK (pJNK) in the female's head. *An. gambiae* females were dissected around the  
123 onset of detectable transcriptional changes (1-6 hpm), and heads were analyzed by Western blot

124 using an antibody specifically recognizing pJNK. Mating induced a marked increase in the levels of  
125 pJNK in the head compared to virgin controls, an effect that was already detectable at 1 hpm and  
126 was still evident at 4 hpm across multiple experiments (Fig. 1a, b). In mated females we detected a  
127 strong band at 46 kDa and a much weaker band at 52 kDa, similar to reports in *An. stephensi*  
128 (Souvannaseng et al., 2018). This mating-induced JNK response was tissue-specific as we did not  
129 detect it in other tissues including the reproductive tract (ovaries, atrium and spermatheca) (Fig. 1c,  
130 Fig. S1a, b). Moreover, while levels of pJNK increased in the heads of mated females (one sample  
131 t test,  $p=0.0496$ ,  $n=4$ ), levels of the phosphorylated (active) form of the related MAP kinase extra-  
132 cellular signal-regulated kinase (pERK) were reduced in mated heads relative to virgin controls (one  
133 sample t test,  $p=0.02$ ,  $n=4$ ) (Fig. S1c), suggesting some level of pathway specificity.

134

### 135 *JNK1 is required for mating-induced oviposition*

136 To determine the contribution of the JNK pathway to post-mating responses, we silenced elements  
137 of the pathway by RNAi and examined the effect on oviposition, a physiological response that is  
138 induced in mated females once eggs are fully developed after blood feeding. Given the annotation  
139 of two distinct *An. gambiae* JNK genes, *JNK1* (AGAP029555) and *JNK3* (AGAP009460), we  
140 performed preliminary experiments to assess the relative expression of each transcript and found  
141 that *JNK1* transcript levels were 2–3 orders of magnitude more abundant than *JNK3* in all tissues  
142 measured (Fig. S2) leading us to focus on the *JNK1* gene product. Thus, virgin females were injected  
143 with dsRNAs targeting *JNK1* (*dsJNK1*, Fig. S3) or its two transcription factor targets, *Jun* (*dsJun*)  
144 and *Fos* (*dsFos*), using dsGFP as control. Using a previously established protocol (Gabrieli et al.,  
145 2014), injected females were then blood-fed and mated, and oviposition rates were measured. *JNK1*  
146 silencing inhibited the mating-induced increase of both strong (46kDa) and weak (52kDa) pJNK  
147 bands in the head (Fig. S4) and significantly prevented oviposition compared to control females  
148 (logistic regression model,  $p<0.0001$ , Fig. 1d). The failure to oviposit after mating was 5.6-fold more  
149 likely in *dsJNK1*-treated females than in *dsGFP*-treated controls (odds ratio [OR]=5.6;  $p<0.0001$ ).  
150 Similarly increased rates of oviposition failure were observed with *dsFos* (OR=4.03,  $p=0.0003$ ) and  
151 *dsJun* (OR=6.2,  $p=0.0002$ ) (Fig. 1d) while we observed no significant effect on the total number of

152 eggs developed (Fig. S5a) or the number of eggs oviposited (Fig. S5b) in any group. Moreover,  
153 *JNK1* depletion reduced the up-regulation of wounding-related genes (*APL1C*, *TEP1* and *PPO2*) in  
154 the female head after mating (Fig. S6). Together, these data suggest the involvement of the JNK  
155 pathway in the mating-induced cascades leading to oviposition in *An. gambiae*.

156

#### 157 *Depletion of the JNK-phosphatase puckered is sufficient to induce oviposition in virgins*

158 Having established a role for the JNK pathway in mating-induced oviposition, we went on to  
159 determine whether an increase in the level of pJNK in the head might be sufficient, *per se*, to induce  
160 oviposition in blood-fed virgin females. The activation of JNK is regulated by the dual phosphorylation  
161 of its TxY motif by the MAP kinase kinase (MAP2K) Hemipterous, and is prevented by  
162 dephosphorylation of the same motif by the dual specificity phosphatase Puckered (Puc), also known  
163 as MAP kinase phosphatase 5 (MKP5). Because depletion of *puc* in *Drosophila* leads to the  
164 spontaneous activation of JNK-responsive genes (Martin-Blanco et al., 1998), we reasoned that  
165 silencing of this phosphatase might mimic the activation of JNK noted after mating. Indeed, *puc*  
166 silencing (Fig. S3) increased pJNK levels relative to controls in the female head across multiple  
167 experiments (Fig. 2a, b), while no noticeable effects were observed in the reproductive tract of the  
168 same females suggesting tissue-specific activation (Fig. 2c). Moreover, a significant proportion of  
169 virgin females (logistic regression model,  $p < 0.0001$ ) injected with *dspuc* laid eggs after blood feeding  
170 (Fig. 2d). Using the logistic regression model applied above, we determined that *dspuc* virgins were  
171 approximately 25-fold more likely to oviposit than controls (OR=24.6,  $p < 0.0028$ ). These results are  
172 consistent with our findings that JNK activation in the head after mating induces oviposition.

173 While in *Drosophila* Puc acts selectively to regulate the JNK pathway (Martin-Blanco et al.,  
174 1998), a recent study in *An. stephensi* suggested that the same phosphatase can impact MAP  
175 kinases other than JNK (Souvannaseng et al., 2018). To address the role of JNK1 in the oviposition  
176 induced by *dspuc*, we performed a double knock down of *puc* and *JNK1*. Consistent with a  
177 predominant role for JNK signaling in regulating this behavior, coinjection of *dspuc* with *dsJNK1*  
178 significantly reduced the frequency of oviposition induced by *dspuc* alone (OR relative to *dspuc* alone



179 3.7,  $p=0.021$ ) without affecting the efficiency of *puc* knock down (Fig. S3). These data suggest that  
180 activation of JNK in the head of a virgin female is sufficient to induce oviposition.

181  
182 *The JNK pathway is required for oviposition induced by exogenous 20E*

183 Since thoracic delivery of exogenous 20E is sufficient to induce oviposition in blood-fed virgin  
184 females (Gabrieli et al., 2014), we next assessed whether injected 20E—like mating (Fig. 1 a,b)—  
185 might also induce an increase in pJNK levels in the head. When compared to controls, a robust  
186 increase in pJNK in the head was observed across multiple experiments 1–2 hours post injection  
187 (hpi) (Fig. 3a, b), while the reproductive tract again showed no JNK activation at these time points  
188 (Fig. 3c).

189 To determine if 20E-induced oviposition occurs via JNK signaling, we silenced *JNK1*, *Jun* or  
190 *Fos* and allowed females to take a blood meal. After completion of egg development, females were  
191 injected with either 20E or a solvent control, and oviposition rates were measured. The number of  
192 females failing to oviposit after 20E-injection increased markedly after treatment with *dsJNK1*  
193 (logistic regression model,  $p<0.0001$ ), compared to *dsGFP*-treated control females (OR of failed  
194 oviposition compared to *dsGFP* control=5.4,  $p<0.0001$ ). Similar results were obtained after silencing  
195 of *Jun* (OR 5.8,  $p<0.0001$ ) and *Fos* (OR 4.1,  $p=0.0006$ ) (Fig. 3d). These data support the involvement  
196 of the JNK pathway in oviposition induced by sexual transfer of the male steroid hormone 20E.  
197 Injection of a solvent control failed to induce oviposition in any *dsRNA* group (94-100% failed  
198 oviposition, see Table S1), as expected (Gabrieli et al., 2014).

## 199 **DISCUSSION**

200 The transfer of the ecdysteroid hormone 20E from *An. gambiae* males to females during copulation  
201 is linked to a life-long license to oviposit eggs developed across multiple gonotrophic cycles (Gabrieli  
202 et al., 2014; Mitchell et al., 2015). Here, we identify the JNK pathway, traditionally associated with  
203 responses to diverse environmental stressors including wounding (Nsango et al., 2013) and  
204 *Plasmodium* infection (Garver et al., 2013; Ramphul et al., 2015), as a key component of the  
205 downstream events linking sexual transfer of 20E to oviposition. We document a rapid and selective  
206 increase in the amount of active pJNK in the heads of mated females that is recapitulated by injection  
207 of exogenous 20E. The activation of JNK in the head after mating appears specific given the absence  
208 of activation of the related MAP kinase, ERK, in the same tissue or of JNK itself in other tissues  
209 (reproductive tract or rest of body). This organ specificity is consistent with our previous microarray  
210 analyses that revealed no mating-induced wound-healing and immune responses in other female  
211 tissues, despite a strong transcriptional response involving hundreds of genes (Gabrieli et al., 2014;  
212 Rogers et al., 2008; Shaw et al., 2014), and contrasts with the striking immune signature and  
213 copulatory wounding reported in *Drosophila* reproductive tract after mating (Mack et al., 2006)  
214 (Mattei et al., 2015).

215 We find that the activation of the JNK pathway in the head is both necessary and sufficient  
216 for at least one element of the post-mating response - the oviposition of developed eggs. RNAi-  
217 mediated depletion of *JNK1* inhibited the mating-induced pJNK signal (Fig. S4) and reduced  
218 oviposition induced either by mating (Fig. 1d) or by the injection of exogenous 20E (Fig. 3d). The  
219 link between this reduced egg laying phenotype and JNK function is highlighted by the fact it was  
220 phenocopied by depletion of *Jun* or *Fos*, transcription factor targets of pJNK. Moreover, activation of  
221 the JNK pathway — by RNAi-induced depletion of *puc* — was sufficient to both increase pJNK levels  
222 in the head (Fig. 2a, b) and trigger oviposition in blood-fed-virgin females (Fig. 2d). Importantly, while  
223 recent data have shown that in some settings *puc* is capable of modulating MAP kinase pathways  
224 other than JNK (Souvannaseng et al., 2018), our data show that the induction of oviposition by  
225 depletion of *puc* is largely reversed by concomitant depletion of *JNK1*, identifying this MAP kinase  
226 as the dominant *puc* target in regulating this phenotype (Fig. 2d).

227           Despite the 100-1000-fold greater transcript abundance of *JNK1* (Fig. S2), we cannot exclude  
228 a contribution to the oviposition phenotype from the *JNK3* gene product, given the 70% identity  
229 between the two over the mRNA sequence targeted by *dsJNK1*. Similarly, the origin and importance  
230 of the two protein bands observed using the pJNK antibody remain unclear. They could reflect the  
231 products of the *JNK1* and *JNK3* genes as suggested by others (Souvannaseng et al., 2018) but  
232 might equally represent alternative post-translationally modified forms of the same gene product.  
233 Future studies using specific antibodies or gene targeting strategies will help address these  
234 questions.

235           Given the partial nature of the effects observed, our data also highlight the likely existence of  
236 JNK-independent pathways controlling oviposition, although we cannot exclude that these effects  
237 are due to incomplete gene silencing. Importantly, in the absence of tissue-specific gene knockout  
238 studies, the systemic nature of RNAi makes it difficult to exclude the possibility that JNK signaling  
239 outside the head may contribute to the regulation of oviposition, notwithstanding the head-specific  
240 activation of JNK observed after mating, 20E injection or *puc* depletion discussed above. The effects  
241 of the JNK pathway appear to affect oviposition rather than oogenesis, since neither the number of  
242 eggs developed or laid are affected by JNK pathway depletion (Fig. S5a, b).

243           While, to our knowledge, this is the first demonstration that the stress-responsive JNK  
244 pathway is involved in an important reproductive behavior such as oviposition, egg laying has been  
245 previously linked to stress responses in mosquitoes. Stressful stimuli including heat, desiccation,  
246 starvation and infection have all been shown to impact on the timing of oviposition (Canyon et al.,  
247 1999; Shaw et al., 2016; Sylvestre et al., 2013), whereas confinement stress has been hypothesized  
248 to increase the frequency of oviposition in various anophelines (Nepomichene et al., 2017). Links  
249 between steroid hormones and stress responses have also been documented (Hirashima et al.,  
250 2000; Ishimoto and Kitamoto, 2010; Zheng et al., 2018). Of particular relevance, 20E titers have  
251 been shown to increase following stressful social interactions such as courtship (Ishimoto et al.,  
252 2009). This has led to the proposal that — akin to related sex steroids in mammals (Parducz et al.,  
253 2006) — 20E functions in insects to consolidate stress-associated memory and to drive pathways of

254 neuronal remodeling underpinning the development of appropriate adaptive behaviors (Ishimoto and  
255 Kitamoto, 2011).

256         Although the mating-mediated mechanisms controlling egg laying remain largely elusive, the  
257 data presented here provide clear evidence of collaboration between 20E and the JNK pathway to  
258 induce oviposition. In fact, such collaboration is well documented during larval/pupal metamorphosis  
259 in *Drosophila*, where 20E and the JNK pathway together drive waves of apoptosis which control the  
260 reshaping or destruction of obsolete larval tissues (Lehmann et al., 2002) as well as the remodeling  
261 of neuronal connections in the larval brain by axon and dendrite pruning (Zhu et al., 2019). It is  
262 plausible that an irreversible process of this type might regulate the lifelong behavioral changes  
263 induced by mating in *An. gambiae*. In future studies, it will be important to examine whether other  
264 elements of the post mating response, such as mating refractoriness, show a similar requirement for  
265 the JNK pathway. In addition, given the importance of the JNK pathway in the *An. gambiae* immune  
266 response to some *Plasmodium* infections (Garver et al., 2013; Ramphul et al., 2015) and the  
267 centrality of 20E to mosquito physiology and parasite development (Werling et al., 2019), it will be  
268 informative to examine whether 20E signaling in other contexts (e.g. after blood feeding) also  
269 engages with the JNK pathway.

270

271 **ACKNOWLEDGEMENTS**

272 The authors gratefully acknowledge the collaboration of the Servizio Immunotrasfusionale, Ospedale  
273 Santa Maria della Misericordia di Perugia for provision of blood samples. The authors thank Dr  
274 Roberta Spaccapelo (Universita degli studi di Perugia) and Dr. Tony Nolan (Liverpool School of  
275 Tropical Medicine) as well as members of the F.C. lab for helpful suggestions and critical reading of  
276 the manuscript. This study was sponsored by European Research Council 7th Research Framework  
277 Programme (Project 'Anorep' Starting Grant 260897), by a Faculty Research Scholar Award by the  
278 Howard Hughes Medical Institute and the Bill & Melinda Gates Foundation (Grant ID: OPP1158190),  
279 and by the National Institutes of Health (R01 AI124165, R01 AI104956) to F.C..

280 **Author Contributions**

281 Conceptualization, M.P., S.N.M. and F.C; Methodology, M.P., S.N.M., E.K., P.G., W.R.S.,  
282 F.C.; Investigation, M.P., S.M., E.K., P.S., P.G., K.W., P.M., P.G. and M.B.; Formal  
283 analysis, M.P., S.N.M., E.K., A.S., K.W., P.M., W.R.S., P.S. and P.G.; Writing- Original  
284 Draft, M.P. and F.C.; Review and editing, M.P., S.N.M., P.G., K.W., V.T. and F.C.;

285 Visualization, M.P, S.N.M and F.C.; Funding Acquisition, F.C.; Resources, V.T. and F.C.;

286 Supervision, M.P. and F.C.

287 **Declaration of Interest**

288 The authors declare no competing interests

289 **FIGURE LEGENDS**

290 **Figure 1. JNK is activated in the head after mating and required for mating-induced**  
291 **oviposition. A-C.** Representative Western blot of extracts of **(A)** heads or **(C)** reproductive tracts  
292 (ovaries, atrium and spermatheca) prepared from virgin or mated females at 1, 2 and 4 hours post  
293 mating (hpm). Tissue extracts were subjected to Western blot analysis with anti-pJNK then stripped  
294 and re-probed with anti-actin as loading control. In **B**, the optical density of bands was quantified  
295 (ImageJ) in different experiments, and the pJNK signal was normalized against actin and expressed  
296 as 'relative phosphorylation' in virgins and females 2 hpm. Differences in the relative pJNK levels in  
297 virgin and mated females were analyzed using a Mann-Whitney test and significant  $p$  values ( $p<0.05$ )  
298 reported. **D.** RNAi silencing of JNK (*dsJNK*), Jun (*dsJun*) or Fos (*dsFos*) prior to mating reduces the  
299 oviposition rates of mated females. The graph shows the percentage of females (mean  $\pm$  SEM from  
300 9 independent biological replicates) failing to oviposit by day 4 post mating, analyzed using a logistic  
301 regression test. For the dataset as a whole, chi-squared=49.1,  $p<0.0001$ .

302

303 **Figure 2. Puckered knock down induces phospho-JNK in the head and JNK1-dependent**  
304 **oviposition in blood-fed virgins. A-C.** Representative Western blot of extracts of **(A)** heads or **(C)**  
305 reproductive tracts (ovaries, atrium and spermatheca) dissected from virgin or mated females  
306 injected with either *dsGFP* (*GFP*) or *dspuc* (*puc*) 48 hours post injection (hpi), using anti-pJNK then  
307 stripped and re-probed with anti-actin as loading control. In **B**, the optical density of bands was  
308 quantified (ImageJ) in different experiments, and the pJNK signal was normalized against actin and  
309 expressed as 'relative phosphorylation' of pJNK in *dsGFP*- and *dspuc*-treated females. The line  
310 between *GFP* and *puc* indicates the removal of an unrelated intervening lane. Differences in the  
311 relative pJNK levels in *dsGFP* and *dspuc*-treated females were analyzed using a Mann-Whitney test  
312 and significant  $p$  values ( $p<0.05$ ) reported. **D.** RNAi silencing of *puc* (*dspuc*) induces oviposition in  
313 blood fed virgins. Virgin females were injected with *dsGFP*, *dsJNK*, *dspuc* or jointly injected with  
314 *dsJNK* and *dspuc*, blood-fed and then placed in oviposition cups. The graph shows the percentage  
315 of females (mean  $\pm$  SEM from 4 independent biological replicates) successfully ovipositing by day 5



316 post blood feeding analyzed using a logistic regression test. For the dataset as a whole chi-  
317 squared=28.4,  $p < 0.0001$ .

318

319 **Figure 3. JNK pathway depletion causes failure of 20E-induced oviposition in blood-fed**  
320 **virgins. A-C.** Representative Western blot of extracts of **(A)** heads or **(C)** reproductive tracts  
321 (ovaries, atrium and spermatheca) dissected from virgin females injected with either 20E or a solvent  
322 control (S) at 1 or 2 hours post injection (hpi) using anti-pJNK, and anti-actin as loading control. In  
323 **B**, the optical density of bands was quantified (ImageJ) in different experiments, and the pJNK signal  
324 was normalized against actin and expressed as ‘relative phosphorylation’ of pJNK in females  
325 injected with solvent or 20E (2hpi), analyzed using a Mann-Whitney test. **D.** Virgin females were  
326 injected with *dsJNK*, *dsJun* or *dsFos*, blood-fed and then injected with 20E or solvent control and  
327 placed in oviposition cups. The graph shows the percentage of females (mean  $\pm$  SEM from 7  
328 independent biological replicates) failing to oviposit by 4 days post 20E injection. Differences in the  
329 relative likelihood of failed oviposition between the indicated groups were analyzed using a logistic  
330 regression test. For the dataset as a whole chi-squared=43.5,  $p < 0.0001$ .

331

332 **Table 1. Genes regulated in the head after mating are enriched in genes linked to wound-**  
333 **healing, hemocytes and the JNK pathway.**

334 The 23 genes identified by microarray as being significantly upregulated in the head after mating  
335 were compared with relevant literature reports: <sup>1</sup> gene families linked to the melanization pathway  
336 (Barillas-Mury, 2007; Michel and Kafatos, 2005); <sup>2</sup> genes upregulated by wounding in *An. gambiae*  
337 (Nsango et al., 2013); <sup>3</sup> genes preferentially expressed in *An. gambiae* hemocytes (Pinto et al.,  
338 2009). The mean mating-induced fold-change over age-matched virgins, the time point at which that  
339 change was observed and the adjusted  $p$  value, after False Discovery Rate (FDR) correction for  
340 multiple testing, are indicated (further detail of statistical validation of microarray data is included in  
341 Methods).

342

## FIGURES

Figure 1

**A**

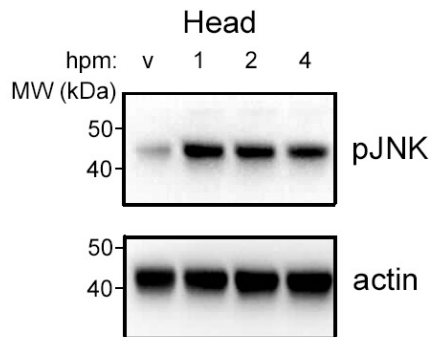

**B**

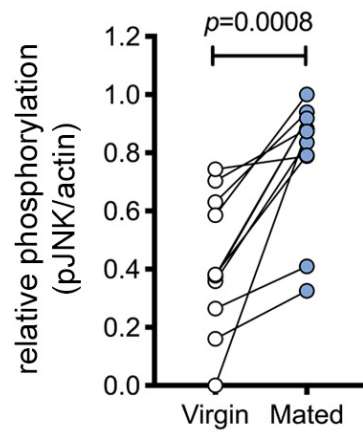

**C**

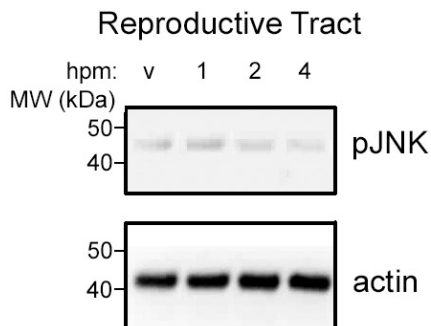

**D**

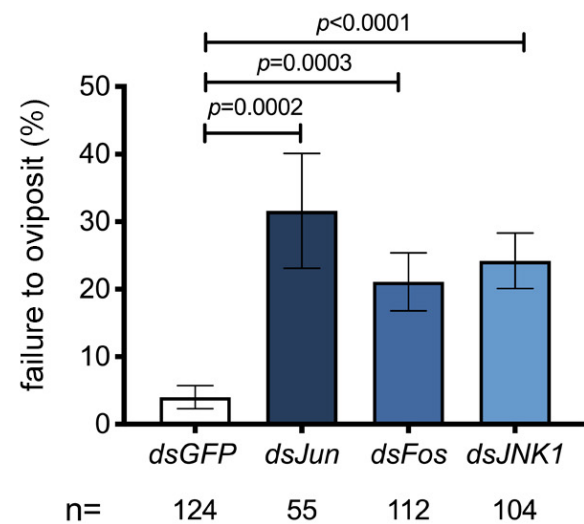

Figure 2

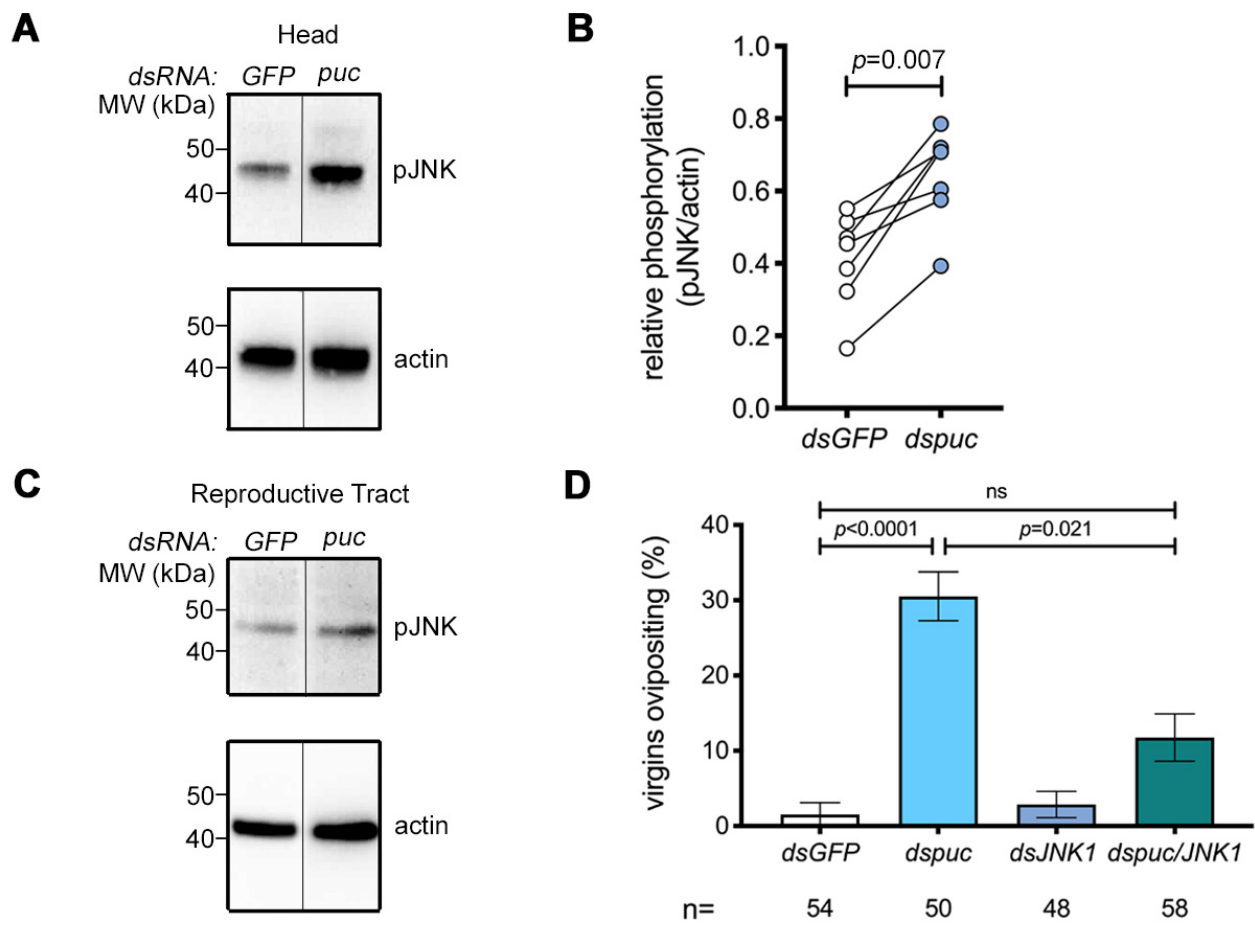

Figure 3

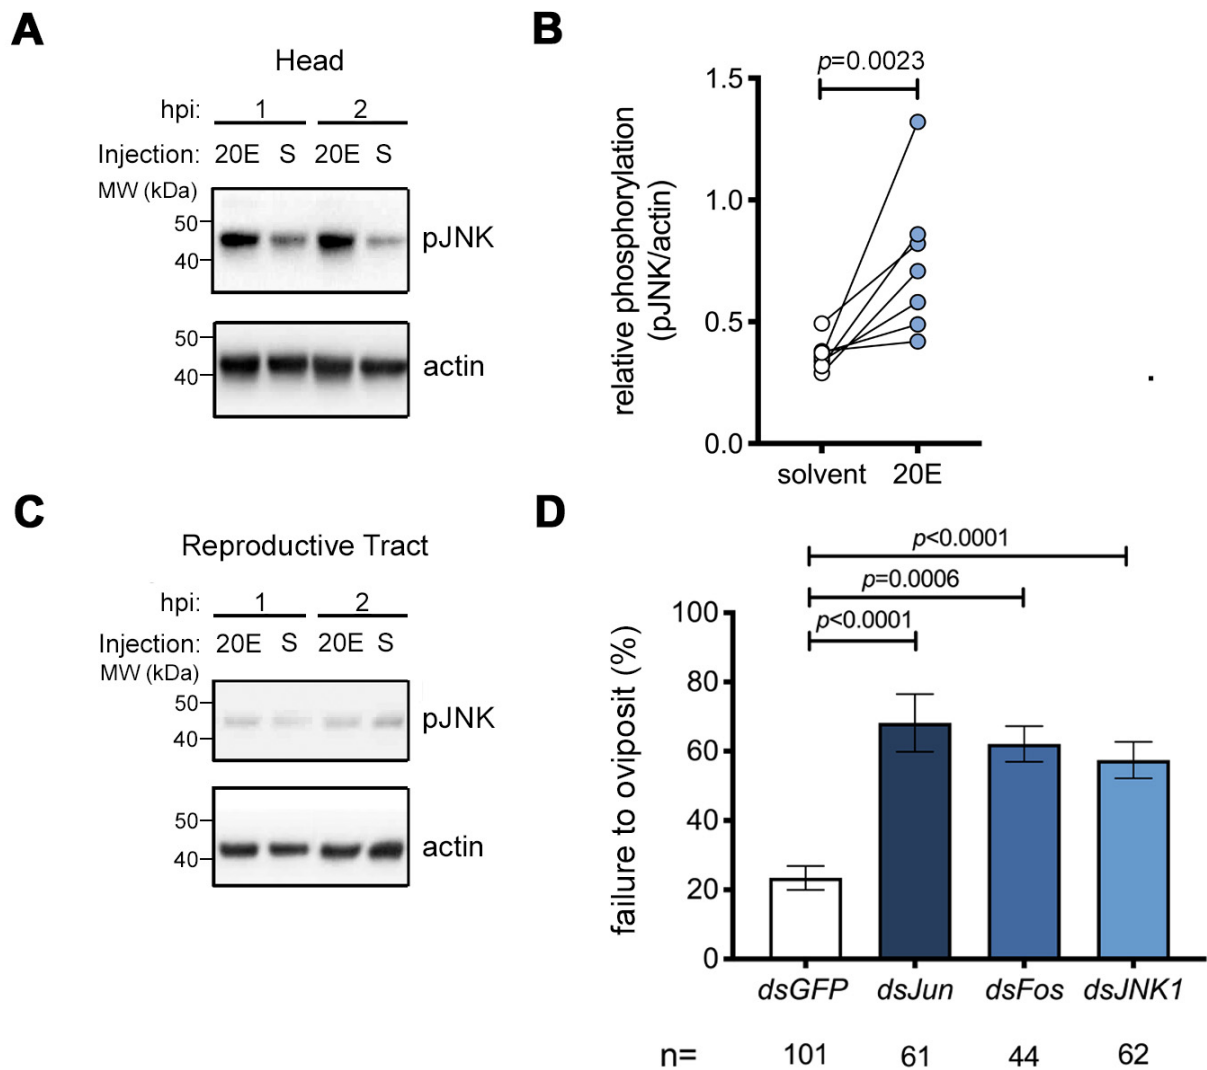

Table 1. Genes regulated by mating in the head

| Gene name                   | AGAP       | Mating regulation              | Link to melanization <sup>1</sup> | Regulated by wounding <sup>2</sup> | Hemocyte-enriched <sup>3</sup> |
|-----------------------------|------------|--------------------------------|-----------------------------------|------------------------------------|--------------------------------|
| <b>Upregulated genes</b>    |            |                                |                                   |                                    |                                |
| <b>Melanization</b>         |            |                                |                                   |                                    |                                |
| PPO2                        | AGAP006258 | 2.5-fold, 24hpm<br>$p=0.0082$  | ✓                                 |                                    | ✓                              |
| PPO5                        | AGAP012616 | 1.8-fold, 24hpm<br>$p=0.0065$  | ✓                                 |                                    | ✓                              |
| PPO6                        | AGAP004977 | 2.1-fold, 24hpm<br>$p=0.0070$  | ✓                                 |                                    | ✓                              |
| CLIPB1                      | AGAP003251 | 1.7-fold, 3hpm<br>$p=0.012$    | ✓                                 |                                    | ✓                              |
| CLIPB15                     | AGAP009844 | 2.8-fold, 24hpm<br>$p=0.011$   | ✓                                 | ✓                                  | ✓                              |
| CLIPC7                      | AGAP003689 | 2.1-fold, 24hpm<br>$p=0.00049$ | ✓                                 | ✓                                  | ✓                              |
| CLIFE11-like                | AGAP003691 | 3.8-fold, 3hpm<br>$p=0.000018$ | ✓                                 | ✓                                  | ✓                              |
| gastrulation-defective      | AGAP013252 | 1.2-fold, 24hpm<br>$p=0.0035$  | ✓                                 |                                    |                                |
| Serpin 17                   | AGAP001376 | 1.8-fold, 3hpm<br>$p=0.0016$   | ✓                                 |                                    | ✓                              |
| Yellow F2                   | AGAP004324 | 2.4-fold, 3hpm<br>$p=0.0075$   | ✓                                 |                                    | ✓                              |
| <b>TEP/LRIM family</b>      |            |                                |                                   |                                    |                                |
| TEP1                        | AGAP010815 | 3.1-fold, 24hpm<br>$p=0.0034$  | ✓                                 | ✓                                  |                                |
| TEP4                        | AGAP010812 | 1.7-fold, 24hpm<br>$p=0.00049$ | ✓                                 |                                    | ✓                              |
| TEP8                        | AGAP010831 | 3.3-fold, 24hpm<br>$p=0.0012$  | ✓                                 |                                    |                                |
| TEP19                       | AGAP010832 | 3.3-fold, 24hpm<br>$p=0.0035$  | ✓                                 |                                    |                                |
| APL1C                       | AGAP007033 | 2.1-fold, 24hpm<br>$p=0.018$   | ✓                                 | ✓                                  | ✓                              |
| <b>Coagulation</b>          |            |                                |                                   |                                    |                                |
| TGase2                      | AGAP009098 | 2.4-fold, 3hpm<br>$p=0.0095$   | ✓                                 | ✓                                  | ✓                              |
| <b>Other</b>                |            |                                |                                   |                                    |                                |
| membrane protease           | AGAP001365 | 1.5-fold, 3hpm<br>$p=0.0078$   |                                   |                                    | ✓                              |
| Unknown                     | AGAP004316 | 3.6-fold, 3hpm<br>$p=0.0075$   |                                   |                                    |                                |
| Vesicle transport           | AGAP006609 | 1.1-fold, 3hpm<br>$p=0.0084$   |                                   |                                    |                                |
| Carboxylsterase             | AGAP011509 | 2.2-fold, 3hpm<br>$p=0.0029$   |                                   |                                    |                                |
| Hsc70                       | AGAP004192 | 2.5-fold, 3hpm<br>$p=0.017$    |                                   |                                    |                                |
| Hsp90b                      | AGAP001424 | 1.1-fold, 3hpm<br>$p=0.012$    |                                   |                                    |                                |
| <b>Down regulated genes</b> |            |                                |                                   |                                    |                                |
| Acytransferase              | AGAP007078 | 1.5-fold, 3hpm<br>$p=0.012$    |                                   |                                    |                                |

## STAR METHODS

### KEY RESOURCE TABLE

| REAGENT OR RESOURCE                                             | SOURCE                | IDENTIFIER                                                                                                                                                                                                                  |
|-----------------------------------------------------------------|-----------------------|-----------------------------------------------------------------------------------------------------------------------------------------------------------------------------------------------------------------------------|
| <b>Antibodies</b>                                               |                       |                                                                                                                                                                                                                             |
| Rabbit polyclonal anti-pJNK                                     | Cell Signaling Inc.   | #4668; RRID:AB_823588                                                                                                                                                                                                       |
| Rabbit polyclonal anti-pERK                                     | Cell Signaling Inc    | #9101; RRID:AB_331646                                                                                                                                                                                                       |
| Rat monoclonal anti- $\beta$ actin (MAC237)                     | AbCam                 | Ab50591; RRID:AB_867488                                                                                                                                                                                                     |
| Goat anti-rabbit-HRP                                            | Thermo Fisher         | G-21234; RRID:AB_2536530                                                                                                                                                                                                    |
| Goat anti-rat-HRP                                               | Thermo Fisher         | 31470; RRID:AB_228356                                                                                                                                                                                                       |
| <b>Bacteria</b>                                                 |                       |                                                                                                                                                                                                                             |
| Top10 OneShot chemically competent <i>Escherichia Coli</i>      | Thermo Fisher         | C404003                                                                                                                                                                                                                     |
| <b>Chemicals</b>                                                |                       |                                                                                                                                                                                                                             |
| 20-hydroxyecdysone (20E)                                        | Sigma Aldrich         | H5142-5mg                                                                                                                                                                                                                   |
| <b>Critical Commercial Assays</b>                               |                       |                                                                                                                                                                                                                             |
| T7 MegaScript in vitro transcription kit                        | Thermo Fisher         | AM1334                                                                                                                                                                                                                      |
| Low input Quick Amp labelling kit                               | Agilent               | 5190-2305                                                                                                                                                                                                                   |
| 44-K <i>An. gambiae</i> whole genome microarray                 | Agilent               | G2519F-020449                                                                                                                                                                                                               |
| <b>Deposited data</b>                                           |                       |                                                                                                                                                                                                                             |
| Mating-regulated genes in head microarray                       | This paper            | ArrayExpress<br># E-MTAB-8733                                                                                                                                                                                               |
| Raw data used to prepare figures                                | This paper            | Mendeley Data doi:<br><a href="https://data.mendeley.com/data-sets/5gmsnv8zw9/draft?a=bc216e76-d54d-4744-98a6-5cd0cf60c8c5">https://data.mendeley.com/data-sets/5gmsnv8zw9/draft?a=bc216e76-d54d-4744-98a6-5cd0cf60c8c5</a> |
| <b>Experimental Models</b>                                      |                       |                                                                                                                                                                                                                             |
| Mosquito: <i>Anopheles gambiae</i> G3                           | B.E.I Resources       | MRA-112                                                                                                                                                                                                                     |
| <b>Oligonucleotides</b>                                         |                       |                                                                                                                                                                                                                             |
| Primers for qRT-PCR or dsRNA template production (See Table S2) | This paper            | N/A                                                                                                                                                                                                                         |
| <b>Recombinant DNA</b>                                          |                       |                                                                                                                                                                                                                             |
| pCR2.1Topo                                                      | Thermo Fisher         | 450641                                                                                                                                                                                                                      |
| pCR2.1 EGFP                                                     | Baldini et al, 2013   | N/A                                                                                                                                                                                                                         |
| pCR2.1 JNK1                                                     | This paper            | Adgene #133284                                                                                                                                                                                                              |
| pCR2.1 puc                                                      | This paper            | Adgene #133285                                                                                                                                                                                                              |
| pCR2.1 Jun                                                      | This paper            | Adgene #133286                                                                                                                                                                                                              |
| pCR2.1 Fos                                                      | This paper            | Adgene #133287                                                                                                                                                                                                              |
| <b>Software and Algorithms</b>                                  |                       |                                                                                                                                                                                                                             |
| Image J image analysis                                          | Schneider et al, 2012 | <a href="https://imagej.nih.gov">https://imagej.nih.gov</a>                                                                                                                                                                 |
| E-RNAi design                                                   |                       | <a href="https://www.dkfz.de/signaling/e-rnai3/">https://www.dkfz.de/signaling/e-rnai3/</a>                                                                                                                                 |
| JMP Pro13                                                       | SAS                   | <a href="https://www.jmp.com/en_be/software/predictive-analytics-software.html">https://www.jmp.com/en_be/software/predictive-analytics-software.html</a>                                                                   |
| Prism 8 statistical and graphing software                       | Graph Pad             | <a href="https://www.graphpad.com">https://www.graphpad.com</a>                                                                                                                                                             |

## 565 **EXPERIMENTAL MODEL AND SUBJECT DETAILS**

566 **Rearing of *Anopheles gambiae* Mosquitoes.** *An. gambiae* mosquitoes of the G3 line were  
567 maintained at 28°C, 70% relative humidity with a 12 hour light/ dark diurnal cycle and water and 10%  
568 glucose solution *ad libitum* and fed weekly on human blood (Servizio Immunotrasfusionale,  
569 Ospedale Santa Maria della Misericordia di Perugia). For mating experiments, males and females  
570 were maintained as virgins by separation of male and female pupae by microscopic examination of  
571 the terminalia and kept in separate cages until sexual maturity (3 days post eclosion).

572

## 573 **METHOD DETAILS**

574 **Oviposition experiments.** Sexually mature, three-day old virgin females were injected (Nanoject II,  
575 Drummond Scientific/Olinto Martelli Srl, Florence, Italy) with 0.69µg (138nl, 5µg/µl double stranded  
576 RNAs [dsRNAs, see below]) targeting JNK pathway components (*JNK1*, *Jun*, *Fos*, or *puckered [puc]*)  
577 or *GFP*, a gene not expressed in these mosquitoes, as a negative control. In experiments in which  
578 two genes were targeted simultaneously (e.g. Figure 2), a mixture of the two *dsRNAs*, in which the  
579 concentration of each was 5µg/µl, was prepared and injected in the same volume (138nl) as a single  
580 dsRNA treatment. Assignment of mosquitoes to different groups was random but groups were not  
581 blinded. The effect of gene depletion on oviposition was assessed essentially as previously  
582 described (Gabrieli et al., 2014). Three days post-injection, females were blood-fed and unfed  
583 females removed from the cage. Two days later (upon completion of egg development), blood-fed  
584 females were induced to oviposit developed eggs either by allowing them to mate (see below) or by  
585 injection of exogenous 20E (Sigma, Milan, Italy; see below). For mating-induced oviposition, females  
586 captured *in copula* were checked using a fluorescence microscope for the presence of a correctly-  
587 positioned, auto-fluorescent mating plug to ensure successful copulation. Mated females were  
588 allowed to recover overnight then placed in individual oviposition cups as described previously  
589 (Gabrieli et al., 2014). For oviposition induced by exogenous 20E, two days post blood feeding,  
590 females were injected (138nl) with 20E (38mM, equivalent to 2.5ng) dissolved in H<sub>2</sub>O containing  
591 10%EtOH and 5% DMSO or with a solvent control (the same diluent minus 20E) and allowed to  
592 recover overnight before being placed in individual oviposition cups. As previously shown (Gabrieli

593 et al., 2014) oviposition in our hands routinely takes place 2 days after mating or 20E injection. Thus,  
594 in accordance with previous similar experiments, mated or injected females were checked every day  
595 for four days after blood feeding and oviposition was deemed to have occurred if a single egg was  
596 detected in the oviposition cup. Females who died before ovipositing were excluded from the  
597 analysis, as were any females who failed to develop eggs on the assumption that they had not taken  
598 a blood meal. Statistical significance of differences between groups in the frequency of oviposition  
599 were assessed using a generalized linear model based on the binary outcome 'oviposition or no  
600 oviposition' by day 4 post mating or 20E injection or day 5 post blood feeding in the case of *dspuc*  
601 treatment. 'Experiment' was included as a variable in the model and experiments statistically  
602 distinguishable from the others were removed as outliers. In the case of mating-induced oviposition  
603 this led to the removal of 2 of 11 experiments while in the case of *dspuc*- or 20E-induced oviposition  
604 no outliers were identified. The model was used to calculate the odds ratios (OR) of the relative  
605 likelihood of oviposition, or failed oviposition, in each group as well as the statistical significance of  
606 inter-group differences.

607

### 608 **Microarray experiments and analysis**

609 Samples for analysis following mating were prepared and analyzed as previously described (Gabrieli  
610 et al., 2014). Briefly, heads from 15 mated or age-matched virgin control females were dissected in  
611 to ice-cold PBS at 3h and 24h post mating and immediately transferred to Tri Reagent (Thermofisher,  
612 Loughborough, UK). Four independent biological replicates were performed on different generations  
613 of the same mosquito line (G3). Total RNA was recovered using standard phenol/chloroform  
614 extraction, followed by DNase-treatment to remove genomic DNA and quantified using a NanoDrop  
615 spectrophotometer (Thermofisher). A one-color labelling strategy was used: RNA (100ng) from each  
616 of the four replicates was labelled using a Low Input Quick Amp Labeling kit (Agilent, Stockport, UK)  
617 following protocol G4140-90040. Labelled RNA was hybridised to 44-K *An. gambiae* whole genome  
618 microarrays (Design ID G2519F-020449). Labelling, hybridization and scanning were performed by  
619 the Institute of Genetics and Molecular and Cellular Biology (Illkirch, France).



620 Microarray datasets were analyzed using the R statistical software environment (version 2.15.0)  
621 running the Linear Models for Microarray Data (Limma) package (version 3.14.4) (Smyth et al.,  
622 2005). Single-color dye signals were background-corrected using the normexp method with an offset  
623 of 16 and were normalized across microarrays using the quantile method. Multiple probes for the  
624 same transcript identifier were collapsed to individual genes, and average fold-change results were  
625 generated for each unique array identifier. Package ArrayQualityMetrics (Kauffmann et al., 2009)  
626 was used for quality control of all microarrays before significance was estimated by fitting a linear  
627 model to each gene across replicated arrays, applying a contrast matrix of comparisons of interest  
628 in the mating-array experiment, and determining an empirical Bayes moderated t statistic. The  
629 decideTests function for multiple testing across genes and contrasts (“global strategy”) was also  
630 used to classify the related t statistics as up, down, or not significantly regulated. *P* values then were  
631 corrected for multiple testing by the Benjamini–Hochberg method (Benjamini and Hochberg, 1995).  
632 Results were exported as Microsoft Excel files, and transcript identifiers [Ensembl Gene ID (AGAP)  
633 numbers or ESTs] with adjusted *P* < 0.05 were selected for further analysis. When possible, ESTs  
634 were identified by using manual submissions of Blastn (Altschul et al., 1990) to the *An. gambiae*  
635 PEST strain genome or were classified as unknown. Gene function annotation was assigned via  
636 VectorBase gene description, Anoxcel summary (Ribeiro et al., 2004), and/or orthology.

637

638 **Western blotting.** The heads, reproductive tracts (containing ovaries, atrium and spermatheca) and,  
639 on occasion, the rest of the body (RoB) were dissected from females (10-15 per point) treated as  
640 indicated in the text and placed in 25 $\mu$ l of homogenization buffer (Tris-HCl, 10mM (pH 7.4); NaCl,  
641 150mM; EDTA, 5mM; Triton X-100 0.5%; sodium dodecylsulfate (SDS), 0.1% w/v; sodium  
642 orthovanadate 10mM, Sodium iodoacetate, 5mM; protease inhibitor cocktail (Sigma, prod. code,  
643 p8340) 10 $\mu$ l /ml; phosphatase inhibitor cocktail III (Sigma, prod. code, p0044) 10 $\mu$ l/ml; sodium  
644 fluoride (1mM) and frozen. Tissues were thawed and homogenized manually using a plastic pestle  
645 then debris pelleted (14000xg, 5 min, RT). The supernatant (18 $\mu$ l) was recovered and mixed with  
646 6 $\mu$ l 4x LDS-PAGE sample buffer (ThermoFisher) supplemented with dithiothreitol (DTT, 5mM) and  
647 denatured at 85°C for 5 min. Proteins were separated over 4-12% gradient Bis-Tris gels

648 (Thermofisher) electrophoretically transferred to nitrocellulose membranes (Thermofisher) and  
649 blocked (1h, RT) in PBS-Tween (PBS containing 0.05% Tween-20 (Euroclone, Milan, Italy))  
650 supplemented with 5% w/v bovine serum albumin (BSA) (anti-pJNK) or with 5% w/v non-fat milk  
651 (actin). Blocked membranes were incubated (overnight, 4°C, 1/1000 dilution in 5% BSA) with rabbit  
652 anti-pJNK (Cell Signaling Inc, Leiden, Netherlands, prod. code, 4668) then washed (4x15 min PBS-  
653 tween) and incubated (1h, RT, 1/5000 dilution in PBS-Tween containing 5% non-fat milk) with anti-  
654 rabbit HRP-conjugated secondary then washed again (4x15min, PBS-Tween) and developed using  
655 enhanced chemiluminescence (ECL) reagents (Amersham, Cambridge, UK) and visualised using  
656 a Fusion FX chemiluminescence detector (Vilber-Lourmat, Marne-la-Vallée, France). Membranes  
657 were then stripped (15 min, RT, ReStore; Thermofisher) and re-probed (1h, RT, 1/10000 diluted in  
658 PBS-tween with 5% non-fat milk) with rat anti- $\beta$ -actin (AbCam, Cambridge, UK, prod. code,  
659 Ab50591) washed (as above) and incubated with anti-rat-HRP (1h, RT, 1/5000 dilution in PBS-tween  
660 containing 5% non-fat milk) then washed and developed with ECL as above. Using exposures which  
661 led to protein signals defined by the Fusion FX software as 'non-saturated' the intensity of developed  
662 bands was analyzed using Image J software and above-background values for pJNK optical density  
663 were divided by the above-background value for actin in the same lane. This ratio (pJNK/actin) was  
664 used as a measure of 'relative phosphorylation' for each sample. Routinely, statistical significance  
665 of differences in relative phosphorylation between groups, was assessed by comparing the relative  
666 phosphorylation values in individual experiments in control vs test groups (virgin vs mated; *dsGFP*  
667 vs *dspsc*; solvent vs 20E), using an unpaired, two-tailed Mann-Whitney test. To compare the effect  
668 of mating on levels of pJNK and pERK in the same head samples, relative phosphorylation levels of  
669 each kinase in mated heads was divided by the value of the same kinase in virgin heads. These  
670 'fold-change' values were compared to a hypothetical value of 1 using a one sample t-test which  
671 tested the null hypothesis that relative phosphorylation values in virgin and mated heads were equal.  
672 The t statistic and degrees for freedom were: pJNK,  $t=3.22$ ,  $df=3$ ; pERK,  $t=4.51$ ,  $df=3$ . Both groups  
673 passed a Shapiro-Wilk normality test (pJNK,  $p=0.77$ ; pERK,  $p=0.59$ ).

674

675

676 **RNAi.** Double-stranded RNA (dsRNA) constructs targeting *puckered* (*puc*, AGAP004353), *JNK1*  
677 (AGAP022950), *Jun* (AGAP006386) and *Fos* (AGAP001093) were prepared using established  
678 methods described elsewhere (Gabrieli et al., 2014). Briefly, PCR primers (see Table S2) specific to  
679 the gene of interest were designed using the E-RNAi webservice ([https://www.dkfz.de/signaling/e-](https://www.dkfz.de/signaling/e-rnai3/)  
680 [rnai3/](https://www.dkfz.de/signaling/e-rnai3/)) and used to generate blunt ended amplicons from *An. gambiae* cDNA which were ligated in  
681 to the TOPO 2.1 vector (Thermofisher) and transformed in to Top10 competent E Coli (Thermofisher)  
682 by heat shock. The purified plasmid was prepared by midiprep kit (Thermofisher) from blue/ white  
683 selected colonies and the insert verified by sequencing. These plasmids have been submitted to  
684 Adgene (pCR2.1 JNK1, #133284, pCR2.1 *puc*, #133285; pCR2.1 *Jun*, #133286, pCR2.1 *Fos*,  
685 #133287). These plasmids were used as a template to generate amplicons of each insert containing  
686 T7 RNA polymerase binding sites from which gene-specific dsRNAs were prepared using a T7  
687 polymerase *in vitro* transcription kit (T7 Megascript, Thermofisher). DNase1-treated dsRNAs were  
688 purified by phenol/chloroform extraction, washed in ethanol and re-suspended in H<sub>2</sub>O at 10-20µg/µL.  
689 As a negative control a dsRNA targeting GFP was prepared in the same way from an EGFP-  
690 containing plasmid described previously (Marois et al., 2012). Experiments in which the efficiency of  
691 knockdown of the targeted gene was found to be less than 20% relative to levels in the *dsGFP*  
692 control were excluded from all analyses.

693

694 **Gene expression analysis by qRT-PCR.** Knock down of targeted genes and mating-regulated  
695 expression of genes of interest was assessed using qRT-PCR using standard methods as described  
696 previously (Shaw et al., 2014). Briefly, dissected tissues were recovered to 10µl of RNA-later  
697 (Ambion) that was immediately supplemented with 250µl Tri-reagent (Thermofisher) and frozen.  
698 Samples were thawed, homogenized using a motorized pestle, and pestles washed with a further  
699 100µl of Tri reagent. Homogenates were then centrifuged (14000 x g, 15 min, 4°C) and supernatants  
700 (300µl) mixed with an equal volume of 100% ethanol and transferred to Direct-zol RNA miniprep  
701 columns (Zymo Research/ Euroclone, Milan, Italy). RNA was washed, DNase-digested on the  
702 column and washed again then eluted in to 20µL H<sub>2</sub>O and RNA content measured  
703 spectrophotometrically. Some of this material (0.5-1µg) was reverse transcribed to cDNA in a

704 reaction volume of 100 $\mu$ l as described in detail elsewhere (Gabrieli et al., 2014) and subsequently  
705 diluted with water to 250 $\mu$ l. Expression of genes of interest was measured in triplicate 5 $\mu$ l aliquots  
706 using Fast SybrGreen master Mix (Thermofisher) and the forward and reverse primers listed in Table  
707 S2 (all 300nM except *Rpl19* reverse primer which was used at 900nM). Reactions were run on a  
708 QuantStudio 3 thermocycler (Thermofisher). The number of cycles required to cross an automatically  
709 assigned threshold level of incorporated SybrGreen fluorescence (CT value) was calculated using the  
710 manufacturer's software. For each sample, the mean CT value obtained for a reference gene  
711 (*Ribosomal protein L19, Rpl19*; AGAP004422) whose expression is insensitive to 20E-dependent  
712 stimuli used in these studies such as mating (Shaw et al., 2014) and blood feeding (Marinotti et al.,  
713 2005), was subtracted from the mean CT value for the gene of interest (delta CT). Samples lacking  
714 at least duplicate CT values separated by less than 0.5 cycles were rerun or discarded as unreliable.  
715 The amplification efficiency of all primer pairs used was found to be within the range 100 $\pm$ 10%. Delta  
716 CT values were used to calculate the expression of the gene of interest relative to *Rpl19* using the  
717 formula: relative expression=2<sup>^(-delta CT)</sup>. On occasion the fold-change in expression was  
718 calculated by dividing the relative expression of a gene of interest in extracts of control mosquitoes  
719 (e.g. virgins or *dsGFP*-treated females) by that in 'treated' mosquitoes (e.g. mated females, *dsJNK1*-  
720 treated) (delta delta CT). Effects of RNAi-mediated *JNK1* depletion on mating-induced expression  
721 changes were analyzed by 2-way ANOVA using relative expression data (2<sup>^(-delta CT)</sup>). Efficiency of  
722 knock down of target genes was calculated using delta delta CT values from *dstarget* vs *dsGFP*  
723 controls and analyzed statistically using a one sample t-test in which the null hypothesis tested was  
724 that the ratio of target expression between *dsGFP* to *dstarget* groups should be equal to 1. The t  
725 statistic and degrees for freedom for each group were: *dsFos* t=6.7, df=6; *dsJun* t=6.9, df=6; *dsJNK1*  
726 t=12.5, df=12; *dspuc* t=16.4, df=11; *dsJNK1* joint t=22.0, df=6; *dspuc* joint t=12.9, df=6. All groups  
727 passed the Kolmogorov-Smirnov normality test (*dsJNK1* [*p*>0.1]; *dspuc* [*p*=0.058] *dsJun* [*p*>0.1];  
728 *dsFos* [*p*>0.1]; *dsJNK1* joint, [*p*>0.1]), *dspuc* joint (*p*>0.1).

729

730 **QUANTIFICATION AND STATISTICAL ANALYSIS.** All Statistical analyses were performed using  
731 Prism 8.0 (GraphPad, La Jolla, USA) except logistic regression analyses which were performed

732 using JMP version 14 (SAS, Cary, USA). Non-parametric methods were used unless the normality  
733 of all groups analyzed could be demonstrated using a Kolmogorov-Smirnov test. In all tests, a  
734 significance cut-off of  $p=0.05$  was applied. Multiple comparisons of the same dataset were corrected  
735 using Dunnett's (for parametric tests) or Dunn's (for non-parametric tests) multiple comparison  
736 correction. On occasion (Figure S1c and Figure S2), the effect of a manipulation was assessed using  
737 a one sample t-test. The ratio of 'test' to 'control' values (test/control) was compared with a  
738 hypothetical value of 1, thus testing the null hypothesis that test and control values were equal. In  
739 these cases the normality of all groups was verified using a Kolmogorov-Smirnov test (Fig S2) or a  
740 Shapiro-Wilk test (Fig. S1c).

741

#### 742 **DATA AND SOFTWARE AVAILABILITY**

743 The microarray data presented here have been deposited in ArrayExpress (E-MTAB-8733).

744 The raw data used to prepare the figures has been deposited in Mendeley Data:

745 [https://data.mendeley.com/datasets/5gmsnv8zw9/draft?a=bc216e76-d54d-4744-98a6-](https://data.mendeley.com/datasets/5gmsnv8zw9/draft?a=bc216e76-d54d-4744-98a6-5cd0cf60c8c5)  
746 [5cd0cf60c8c5](https://data.mendeley.com/datasets/5gmsnv8zw9/draft?a=bc216e76-d54d-4744-98a6-5cd0cf60c8c5)

747

748

762 **REFERENCES**

- 763 Altschul, S.F., Gish, W., Miller, W., Myers, E.W., and Lipman, D.J. (1990). Basic local alignment  
764 search tool. *J. Mol. Biol.* *215*, 403-410.  
765
- 766 Baldini, F., Gabrieli, P., Rogers, D.W., and Catteruccia, F. (2012). Function and composition of  
767 male accessory gland secretions in *Anopheles gambiae*: a comparison with other insect vectors of  
768 infectious diseases. *Pathog. Glob. Health* *106*, 82-93.  
769
- 770 Baldini, F., Gabrieli, P., South, A., Valim, C., Mancini, F., and Catteruccia, F. (2013). The  
771 interaction between a sexually transferred steroid hormone and a female protein regulates  
772 oogenesis in the malaria mosquito *Anopheles gambiae*. *PLoS Biol.* *11*, e1001695.  
773
- 774 Barillas-Mury, C. (2007). CLIP proteases and *Plasmodium* melanization in *Anopheles gambiae*.  
775 *Trends Parasitol.* *23*, 297-299.  
776
- 777 Benjamini, Y., and Hochberg, Y. (1995). Controlling the False Discovery Rate: A Practical and  
778 Powerful Approach to Multiple Testing. *Journal of the Royal Statistical Society. Series B* *57*, 289-  
779 300.  
780
- 781 Bidla, G., Hauling, T., Dushay, M.S., and Theopold, U. (2009). Activation of insect phenoloxidase  
782 after injury: endogenous versus foreign elicitors. *J. Innate Immun.* *1*, 301-308.  
783
- 784 Blandin, S., Shiao, S.H., Moita, L.F., Janse, C.J., Waters, A.P., Kafatos, F.C., and Levashina, E.A.  
785 (2004). Complement-like protein TEP1 is a determinant of vectorial capacity in the malaria vector  
786 *Anopheles gambiae*. *Cell* *116*, 661-670.  
787
- 788 Blandin, S.A., Marois, E., and Levashina, E.A. (2008). Antimalarial responses in *Anopheles*  
789 *gambiae*: from a complement-like protein to a complement-like pathway. *Cell Host Microbe* *3*, 364-  
790 374.  
791
- 792 Canyon, D.V., Hii, J.L., and Muller, R. (1999). Adaptation of *Aedes aegypti* (Diptera: Culicidae)  
793 oviposition behavior in response to humidity and diet. *J. Insect Physiol.* *45*, 959-964.  
794
- 795 Chen, P.S., Stumm-Zollinger, E., Aigaki, T., Balmer, J., Bienz, M., and Bohlen, P. (1988). A male  
796 accessory gland peptide that regulates reproductive behavior of female *D. melanogaster*. *Cell* *54*,  
797 291-298.  
798
- 799 Childs, L.M., Cai, F.Y., Kakani, E.G., Mitchell, S.N., Paton, D., Gabrieli, P., Buckee, C.O., and  
800 Catteruccia, F. (2016). Disrupting Mosquito Reproduction and Parasite Development for Malaria  
801 Control. *PLoS Pathog.* *12*, e1006060.  
802
- 803 Christensen, B.M., Li, J., Chen, C.C., and Nappi, A.J. (2005). Melanization immune responses in  
804 mosquito vectors. *Trends Parasitol.* *21*, 192-199.  
805
- 806 Dalton, J.E., Kacheria, T.S., Knott, S.R., Lebo, M.S., Nishitani, A., Sanders, L.E., Stirling, E.J.,  
807 Winbush, A., and Arbeitman, M.N. (2010). Dynamic, mating-induced gene expression changes in  
808 female head and brain tissues of *Drosophila melanogaster*. *BMC Genomics* *11*, 541.  
809
- 810 Fogarty, C.E., Diwanji, N., Lindblad, J.L., Tare, M., Amcheslavsky, A., Makhijani, K., Bruckner, K.,  
811 Fan, Y., and Bergmann, A. (2016). Extracellular Reactive Oxygen Species Drive Apoptosis-  
812 Induced Proliferation via *Drosophila* Macrophages. *Curr. Biol.* *26*, 575-584.  
813

- 814 Fraiture, M., Baxter, R.H., Steinert, S., Chelliah, Y., Frolet, C., Quispe-Tintaya, W., Hoffmann, J.A.,  
815 Blandin, S.A., and Levashina, E.A. (2009). Two mosquito LRR proteins function as complement  
816 control factors in the TEP1-mediated killing of Plasmodium. *Cell Host Microbe* 5, 273-284.  
817
- 818 Gabrieli, P., Kakani, E.G., Mitchell, S.N., Mameli, E., Want, E.J., Mariezcurrena Anton, A., Serrao,  
819 A., Baldini, F., and Catteruccia, F. (2014). Sexual transfer of the steroid hormone 20E induces the  
820 postmating switch in *Anopheles gambiae*. *Proc. Natl. Acad. Sci. U S A* 111, 16353-16358.  
821
- 822 Garver, L.S., de Almeida Oliveira, G., and Barillas-Mury, C. (2013). The JNK pathway is a key  
823 mediator of *Anopheles gambiae* antiplasmodial immunity. *PLoS Pathog.* 9, e1003622.  
824
- 825 Hammond, A., Galizi, R., Kyrou, K., Simoni, A., Siniscalchi, C., Katsanos, D., Gribble, M., Baker,  
826 D., Marois, E., Russell, S., *et al.* (2016). A CRISPR-Cas9 gene drive system targeting female  
827 reproduction in the malaria mosquito vector *Anopheles gambiae*. *Nat. Biotechnol.* 34, 78-83.  
828
- 829 Haussmann, I.U., Hemani, Y., Wijesekera, T., Dauwalder, B., and Soller, M. (2013). Multiple  
830 pathways mediate the sex-peptide-regulated switch in female *Drosophila* reproductive behaviours.  
831 *Proc. Biol. Sci.* 280, 20131938.  
832
- 833 Hemingway, J. (2014). The role of vector control in stopping the transmission of malaria: threats  
834 and opportunities. *Philos. Trans. R. Soc. Lond. B Biol. Sci.* 369, 20130431.  
835
- 836 Hirashima, A., Rauschenbach, I., and Sukhanova, M. (2000). Ecdysteroids in stress responsive  
837 and nonresponsive *Drosophila virilis* lines under stress conditions. *Biosci. Biotechnol. Biochem.* 64,  
838 2657-2662.  
839
- 840 Ishimoto, H., and Kitamoto, T. (2010). The steroid molting hormone Ecdysone regulates sleep in  
841 adult *Drosophila melanogaster*. *Genetics* 185, 269-281.  
842
- 843 Ishimoto, H., and Kitamoto, T. (2011). Beyond molting--roles of the steroid molting hormone  
844 ecdysone in regulation of memory and sleep in adult *Drosophila*. *Fly (Austin)* 5, 215-220.  
845
- 846 Ishimoto, H., Sakai, T., and Kitamoto, T. (2009). Ecdysone signaling regulates the formation of  
847 long-term courtship memory in adult *Drosophila melanogaster*. *Proc. Natl. Acad. Sci. U S A* 106,  
848 6381-6386.  
849
- 850 Kauffmann, A., Gentleman, R., and Huber, W. (2009). arrayQualityMetrics--a bioconductor  
851 package for quality assessment of microarray data. *Bioinformatics* 25, 415-416.  
852
- 853 Lee, W.J., and Miura, M. (2014). Mechanisms of systemic wound response in *Drosophila*. *Curr.*  
854 *Top. Dev. Biol.* 108, 153-183.  
855
- 856 Lehmann, M., Jiang, C., Ip, Y.T., and Thummel, C.S. (2002). AP-1, but not NF-kappa B, is required  
857 for efficient steroid-triggered cell death in *Drosophila*. *Cell Death Differ.* 9, 581-590.  
858
- 859 Mack, P.D., Kapelnikov, A., Heifetz, Y., and Bender, M. (2006). Mating-responsive genes in  
860 reproductive tissues of female *Drosophila melanogaster*. *Proc. Natl. Acad. Sci. U S A* 103, 10358-  
861 10363.  
862
- 863 Marinotti, O., Nguyen, Q.K., Calvo, E., James, A.A., and Ribeiro, J.M. (2005). Microarray analysis  
864 of genes showing variable expression following a blood meal in *Anopheles gambiae*. *Insect Mol.*  
865 *Biol.* 14, 365-373.  
866
- 867 Marois, E., Scali, C., Soichot, J., Kappler, C., Levashina, E.A., and Catteruccia, F. (2012). High-  
868 throughput sorting of mosquito larvae for laboratory studies and for future vector control  
869 interventions. *Malar. J.* 11, 302.

870

871 Martin-Blanco, E., Gampel, A., Ring, J., Virdee, K., Kirov, N., Tolkovsky, A.M., and Martinez-Arias,  
872 A. (1998). puckerred encodes a phosphatase that mediates a feedback loop regulating JNK activity  
873 during dorsal closure in *Drosophila*. *Genes Dev.* 12, 557-570.

874

875 Mattei, A.L., Riccio, M.L., Avila, F.W., and Wolfner, M.F. (2015). Integrated 3D view of postmating  
876 responses by the *Drosophila melanogaster* female reproductive tract, obtained by micro-computed  
877 tomography scanning. *Proc. Natl. Acad. Sci. U S A* 112, 8475-8480.

878

879 Michel, K., and Kafatos, F.C. (2005). Mosquito immunity against *Plasmodium*. *Insect Biochem.*  
880 *Mol. Biol.* 35, 677-689.

881

882 Mitchell, S.N., and Catteruccia, F. (2017). Anopheline Reproductive Biology: Impacts on Vectorial  
883 Capacity and Potential Avenues for Malaria Control. *Cold Spring Harb. Perspect. Med.*

884

885 Mitchell, S.N., Kakani, E.G., South, A., Howell, P.I., Waterhouse, R.M., and Catteruccia, F. (2015).  
886 Mosquito biology. Evolution of sexual traits influencing vectorial capacity in anopheline  
887 mosquitoes. *Science* 347, 985-988.

888

889 Nepomichene, T.N., Andrianaivolambo, L., Boyer, S., and Bourgouin, C. (2017). Efficient method  
890 for establishing F1 progeny from wild populations of *Anopheles* mosquitoes. *Malar. J.* 16, 21.

891

892 Nsango, S.E., Pompon, J., Xie, T., Rademacher, A., Fraiture, M., Thoma, M., Awono-Ambene,  
893 P.H., Moyou, R.S., Morlais, I., and Levashina, E.A. (2013). AP-1/Fos-TGase2 axis mediates  
894 wounding-induced *Plasmodium falciparum* killing in *Anopheles gambiae*. *J. Biol. Chem.* 288,  
895 16145-16154.

896

897 Parducz, A., Hajszan, T., Maclusky, N.J., Hoyk, Z., Csakvari, E., Kurunczi, A., Prange-Kiel, J., and  
898 Leranth, C. (2006). Synaptic remodeling induced by gonadal hormones: neuronal plasticity as a  
899 mediator of neuroendocrine and behavioral responses to steroids. *Neuroscience* 138, 977-985.

900

901 Pinto, S.B., Lombardo, F., Koutsos, A.C., Waterhouse, R.M., McKay, K., An, C., Ramakrishnan,  
902 C., Kafatos, F.C., and Michel, K. (2009). Discovery of *Plasmodium* modulators by genome-wide  
903 analysis of circulating hemocytes in *Anopheles gambiae*. *Proc. Natl. Acad. Sci. U S A* 106, 21270-  
904 21275.

905

906 Pondeville, E., Maria, A., Jacques, J.C., Bourgouin, C., and Dauphin-Villemant, C. (2008).  
907 *Anopheles gambiae* males produce and transfer the vitellogenic steroid hormone 20-  
908 hydroxyecdysone to females during mating. *Proc. Natl. Acad. Sci. U S A* 105, 19631-19636.

909

910 Pondeville, E., Puchot, N., Lang, M., Cherrier, F., Schaffner, F., Dauphin-Villemant, C., Bischoff,  
911 E., and Bourgouin, C. (2019). Evolution of sexually-transferred steroids and mating-induced  
912 phenotypes in *Anopheles* mosquitoes. *Sci. Rep.* 9, 4669.

913

914 Povelones, M., Upton, L.M., Sala, K.A., and Christophides, G.K. (2011). Structure-function analysis  
915 of the *Anopheles gambiae* LRIM1/APL1C complex and its interaction with complement C3-like  
916 protein TEP1. *PLoS Pathog.* 7, e1002023.

917

918 Ramet, M., Lanot, R., Zachary, D., and Manfruelli, P. (2002). JNK signaling pathway is required for  
919 efficient wound healing in *Drosophila*. *Dev. Biol.* 241, 145-156.

920

921 Ramphul, U.N., Garver, L.S., Molina-Cruz, A., Canepa, G.E., and Barillas-Mury, C. (2015).  
922 *Plasmodium falciparum* evades mosquito immunity by disrupting JNK-mediated apoptosis of  
923 invaded midgut cells. *Proc. Natl. Acad. Sci. U S A* 112, 1273-1280.

924



- 925 Ribeiro, J.M., Topalis, P., and Louis, C. (2004). Anoxcel: an Anopheles gambiae protein database.  
926 Insect. Mol. Biol. 13, 449-457.  
927
- 928 Rogers, D.W., Baldini, F., Battaglia, F., Panico, M., Dell, A., Morris, H.R., and Catteruccia, F.  
929 (2009). Transglutaminase-mediated semen coagulation controls sperm storage in the malaria  
930 mosquito. PLoS Biol. 7, e1000272.  
931
- 932 Rogers, D.W., Whitten, M.M., Thailayil, J., Soichot, J., Levashina, E.A., and Catteruccia, F. (2008).  
933 Molecular and cellular components of the mating machinery in Anopheles gambiae females. Proc.  
934 Natl. Acad. Sci. U S A 105, 19390-19395.  
935
- 936 Rubinstein, C.D., and Wolfner, M.F. (2013). Drosophila seminal protein ovulin mediates ovulation  
937 through female octopamine neuronal signaling. Proc. Natl. Acad. Sci. U S A 110, 17420-17425.  
938
- 939 Shaw, W.R., Marcenac, P., Childs, L.M., Buckee, C.O., Baldini, F., Sawadogo, S.P., Dabire, R.K.,  
940 Diabate, A., and Catteruccia, F. (2016). Wolbachia infections in natural Anopheles populations  
941 affect egg laying and negatively correlate with Plasmodium development. Nature communications  
942 7, 11772.  
943
- 944 Shaw, W.R., Teodori, E., Mitchell, S.N., Baldini, F., Gabrieli, P., Rogers, D.W., and Catteruccia, F.  
945 (2014). Mating activates the heme peroxidase HPX15 in the sperm storage organ to ensure fertility  
946 in Anopheles gambiae. Proc. Natl. Acad. Sci. U S A 111, 5854-5859.  
947
- 948 Smyth, G.K., Michaud, J., and Scott, H.S. (2005). Use of within-array replicate spots for assessing  
949 differential expression in microarray experiments. Bioinformatics 21, 2067-2075.  
950
- 951 Souvannaseng, L., Hun, L.V., Baker, H., Klyver, J.M., Wang, B., Pakpour, N., Bridgewater, J.M.,  
952 Napoli, E., Giulivi, C., Riehle, M.A., *et al.* (2018). Inhibition of JNK signaling in the Asian malaria  
953 vector Anopheles stephensi extends mosquito longevity and improves resistance to Plasmodium  
954 falciparum infection. PLoS Pathog. 14, e1007418.  
955
- 956 Stramer, B., Winfield, M., Shaw, T., Millard, T.H., Woolner, S., and Martin, P. (2008). Gene  
957 induction following wounding of wild-type versus macrophage-deficient Drosophila embryos.  
958 EMBO reports 9, 465-471.  
959
- 960 Sylvestre, G., Gandini, M., and Maciel-de-Freitas, R. (2013). Age-dependent effects of oral  
961 infection with dengue virus on Aedes aegypti (Diptera: Culicidae) feeding behavior, survival,  
962 oviposition success and fecundity. PLoS One 8, e59933.  
963
- 964 Tang, H. (2009). Regulation and function of the melanization reaction in Drosophila. Fly (Austin) 3,  
965 105-111.  
966
- 967 Wang, F., Wang, K., Forknall, N., Patrick, C., Yang, T., Parekh, R., Bock, D., and Dickson, B.J.  
968 (2020). Neural circuitry linking mating and egg laying in Drosophila females. Nature 579, 101-105.  
969
- 970 Wang, M.C., Bohmann, D., and Jasper, H. (2003). JNK signaling confers tolerance to oxidative  
971 stress and extends lifespan in Drosophila. Dev. Cell 5, 811-816.  
972
- 973 Wang, M.C., Bohmann, D., and Jasper, H. (2005). JNK extends life span and limits growth by  
974 antagonizing cellular and organism-wide responses to insulin signaling. Cell 121, 115-125.  
975
- 976 Werling, K., Shaw, W.R., Itoe, M.A., Westervelt, K.A., Marcenac, P., Paton, D.G., Peng, D., Singh,  
977 N., Smidler, A.L., South, A., *et al.* (2019). Steroid Hormone Function Controls Non-competitive  
978 Plasmodium Development in Anopheles. Cell 177, 315-325.e314.  
979
- 980 WHO (2019). World Malaria Report 2019 (World Health Organization).

981

982 Yapici, N., Kim, Y.J., Ribeiro, C., and Dickson, B.J. (2008). A receptor that mediates the post-  
983 mating switch in *Drosophila* reproductive behaviour. *Nature* *451*, 33-37.

984

985 Zheng, W., Rus, F., Hernandez, A., Kang, P., Goldman, W., Silverman, N., and Tatar, M. (2018).  
986 Dehydration triggers ecdysone-mediated recognition-protein priming and elevated anti-bacterial  
987 immune responses in *Drosophila* Malpighian tubule renal cells. *BMC Biol.* *16*, 60.

988

989 Zhu, S., Chen, R., Soba, P., and Jan, Y.N. (2019). JNK signaling coordinates with ecdysone  
990 signaling to promote pruning of *Drosophila* sensory neuron dendrites. *Development* *146*.

991

992
